# Supplementary material for: A dual therapeutic system based on corrole-siRNA conjugates
Source: Royal Society of Chemistry journal article supplement (doi:10.1039/d1ob02468j), 2022-01-01
Supplement: d1ob02468j1.pdf [file d1ob02468j1.pdf]

## Supplementary Data

Ifrodet Georgees<sup>1</sup>, Fan Wu<sup>2</sup>, Zhen Shen<sup>2</sup>, Jean-Paul Desaulniers<sup>1</sup>

- 1- Ontario Tech University, Department of Chemistry, 2000 Simcoe Street North, Oshawa, Ontario L1G 0C5.
- 2- State Key Laboratory of Coordination Chemistry, School of Chemistry and Chemical Engineering, Nanjing University, Nanjing 210046, P. R. China.

### Contents

|                                                          |    |
|----------------------------------------------------------|----|
| <sup>1</sup> H-NMR spectrum of compound 3.....           | 2  |
| <sup>13</sup> C-NMR spectrum of compound 3.....          | 3  |
| <sup>31</sup> P-NMR spectrum of compound 4.....          | 4  |
| <sup>1</sup> H-NMR spectrum of compound 4.....           | 5  |
| <sup>1</sup> H-NMR spectrum of compound 6.....           | 5  |
| <sup>31</sup> P-NMR spectrum of compound 6.....          | 6  |
| Summary of corrole-siRNA T <sub>m</sub> and MW data..... | 7  |
| HPLC Traces of sense strand oligos of S1-S4.....         | 7  |
| IC <sub>50</sub> Data .....                              | 10 |

# <sup>1</sup>H-NMR spectrum of compound 3

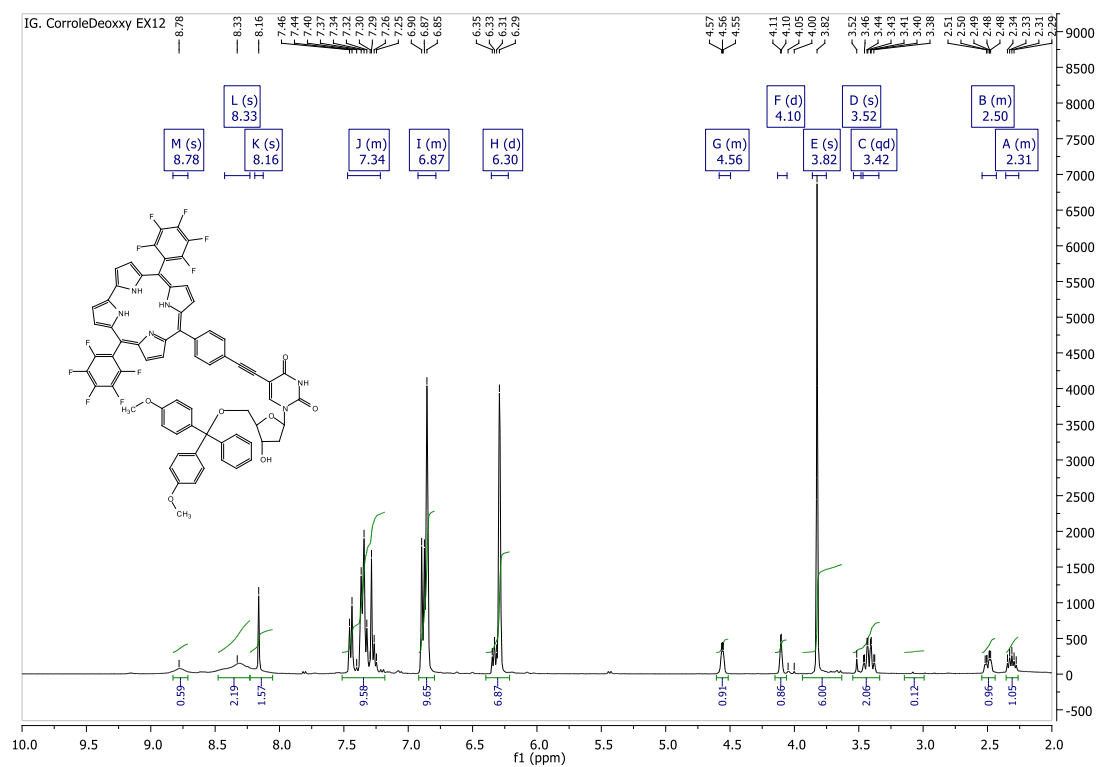

# <sup>13</sup>C-NMR spectrum of compound 3

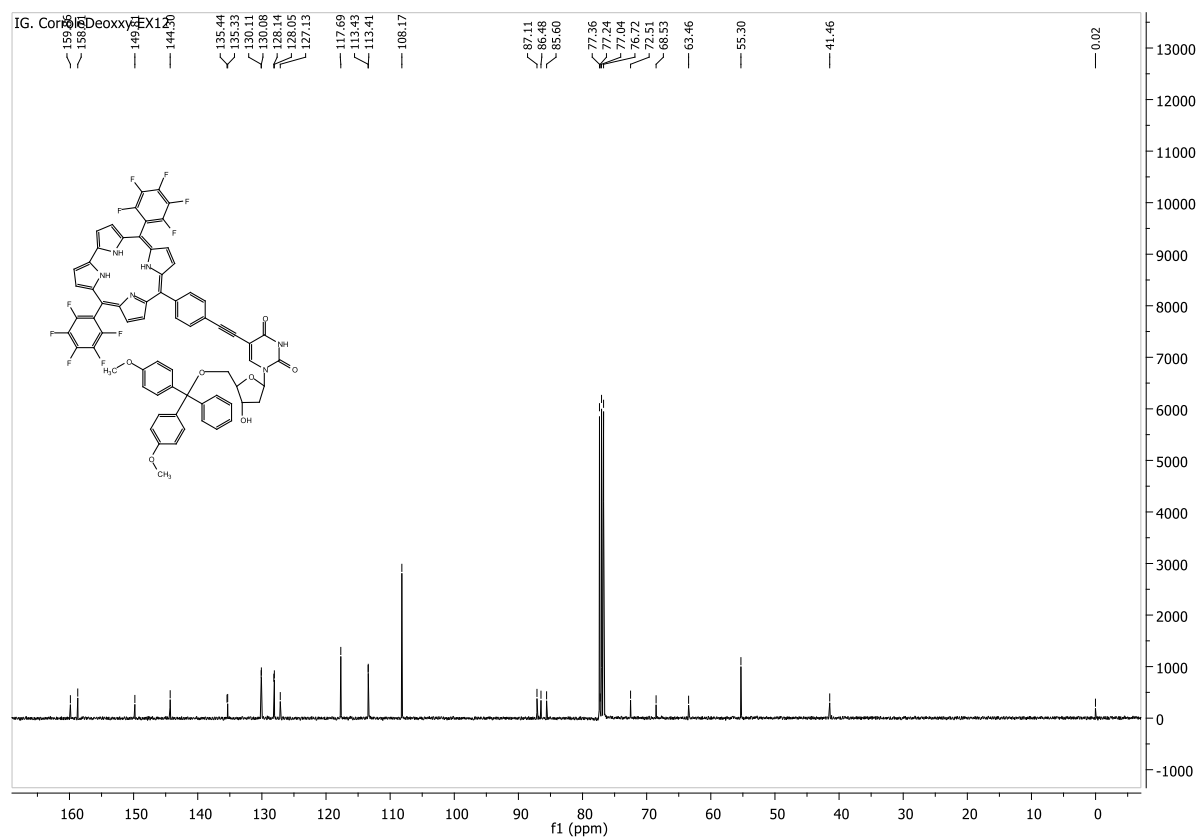

$^{31}\text{P}$ -NMR spectrum of compound 4

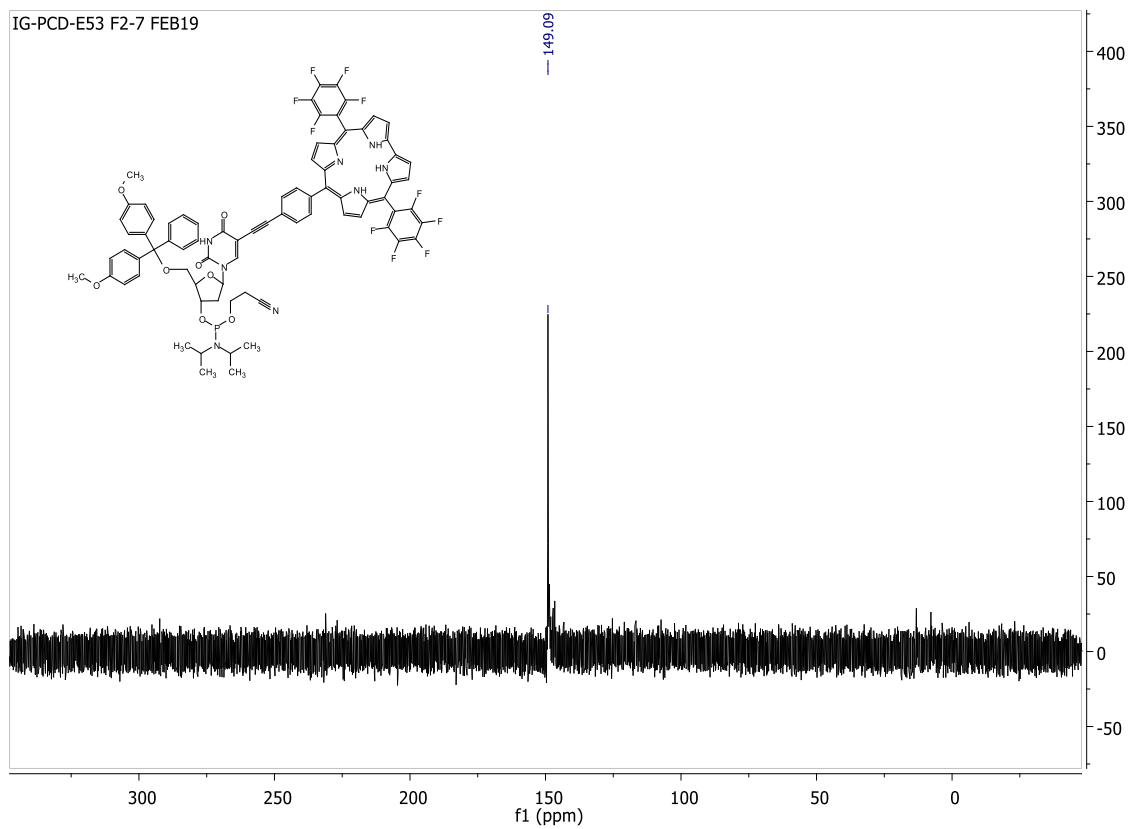

<sup>1</sup>H-NMR spectrum of compound 4

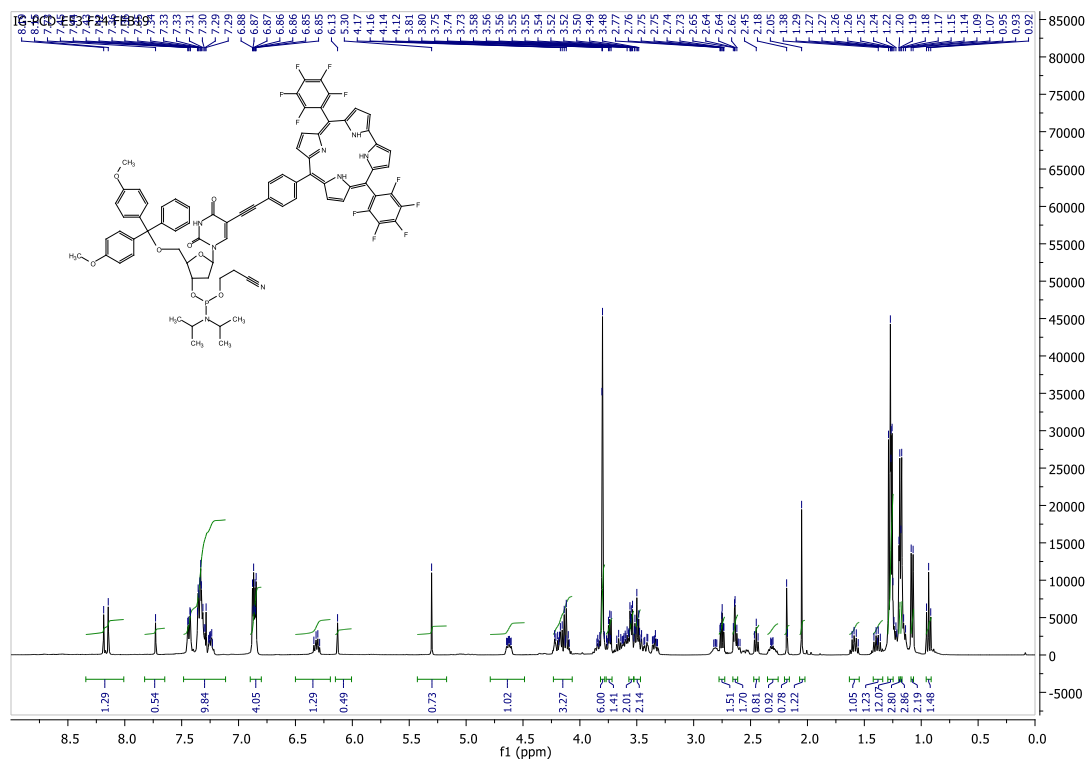

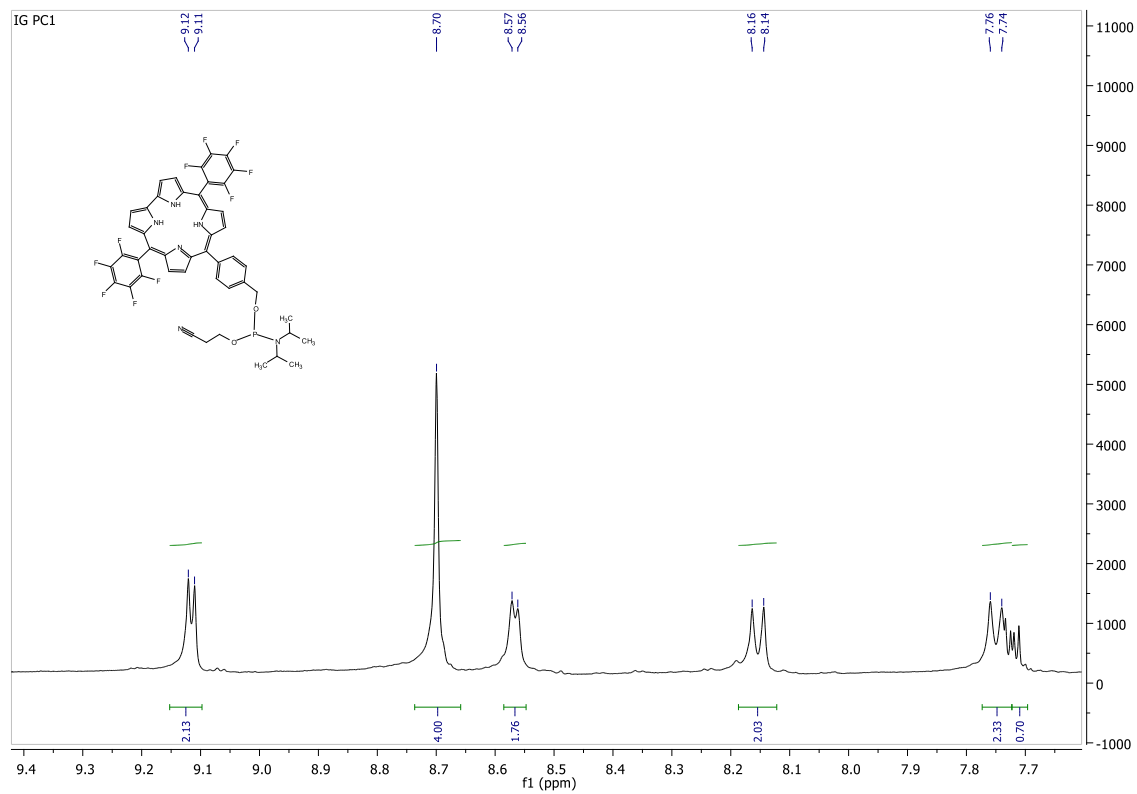

$^{31}\text{P}$ -NMR spectrum of compound 6

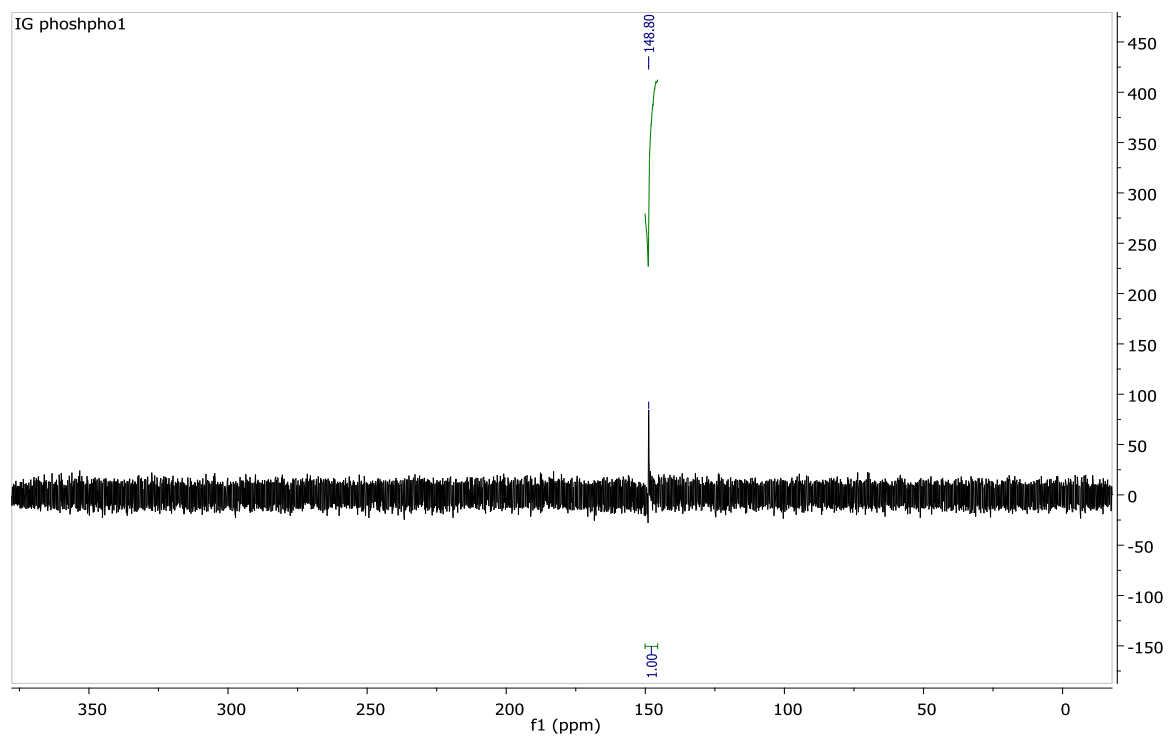

## Summary of corrole-siRNA Tm and MW data

**S1:** Corrole-siRNA sequences targeting Firefly luciferase mRNA, melting temperatures, and the calculated and found molecular weights of the modified sequences. The top siRNA strand corresponds to the sense strand and the bottom strand is the antisense strand. **Y** corresponds to the modification based from phosphoramidite 6, and **X** corresponds to the deoxyuridine-corrole modification based from phosphoramidite 4 and **WT** is wild-type.

| Modifications   | Name | siRNA duplex                                                        | Tm (°C) | $\Delta T_m$ (°C) | Calc. MW of sense strand | Found MW of sense strand |
|-----------------|------|---------------------------------------------------------------------|---------|-------------------|--------------------------|--------------------------|
| N/A             | WT   | 5'-CUUACGCUGAGUACUUCGAtt-3'<br>3'-ttGAAUGCACUCAUGAAGCU-5'           | 74      | -                 | -                        | -                        |
| OH-Corrole-1    | S1   | 5'- <b>Y</b> CUUACGCUGAGUACUUCGAtt-3'<br>3'-ttGAAUGCACUCAUGAAGCU-5' | 58      | -16               | 7400.9843                | 7400.2548                |
| Alkyl-Corrole-2 | S2   | 5'- <b>X</b> UUACGCUGAGUACUUCGAtt-3'<br>3'-ttGAAUGCACUCAUGAAGCU-5'  | 58      | -16               | 7322.0061                | 7322.0565                |
| Alkyl-Corrole-3 | S3   | 5'-CUUACGCUG <b>X</b> GUACUUCGAtt-3'<br>3'-ttGAAUGCACUCAUGAAGCU-5'  | 60      | -14               | 7292.9781                | 7292.5580                |
| Alkyl-Corrole-4 | S4   | 5'-CUUACGCUGAG <b>X</b> ACUUCGAtt-3'<br>3'-ttGAAUGCACUCAUGAAGCU-5'  | 60      | -14               | 7320.0124                | 7320.7443                |

## HPLC Traces of sense strand oligos of S1-S4.

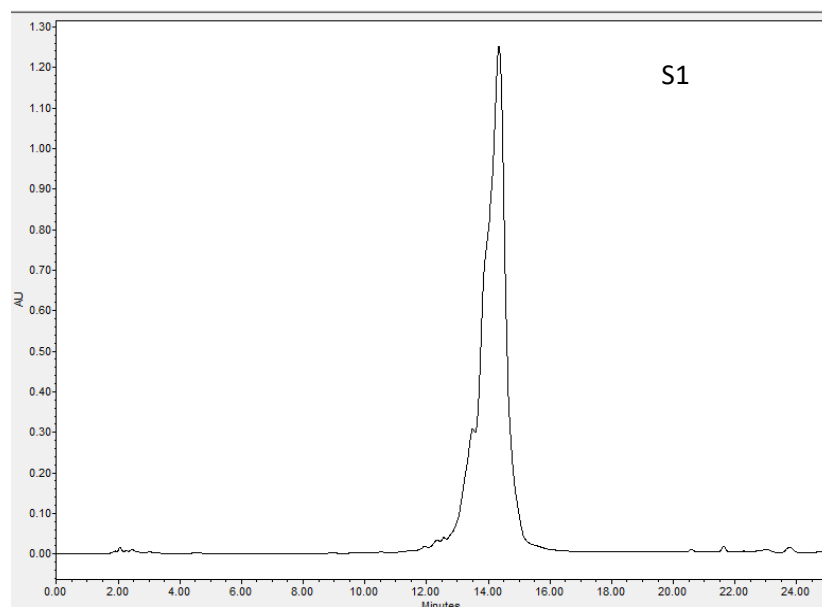

**S2.** Analytical HPLC spectra for the sense strand of corrole-siRNA S1.

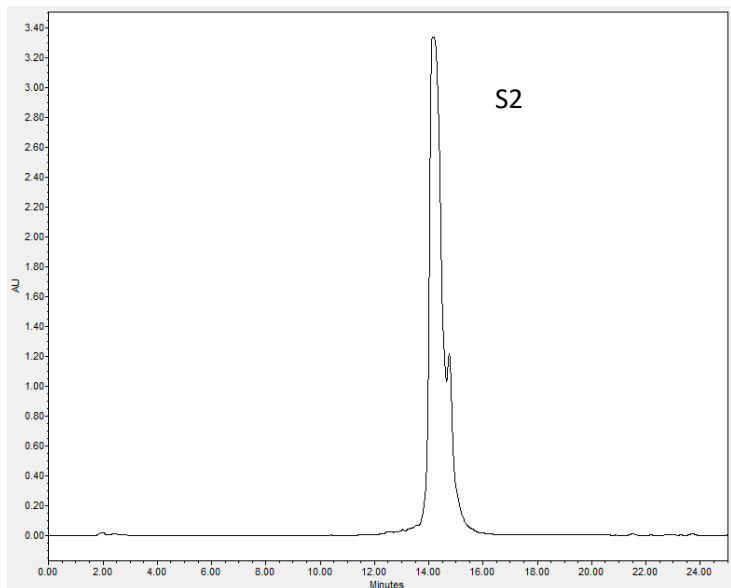

**S3.** Analytical HPLC spectra for the sense strand of corrole-siRNA S2.

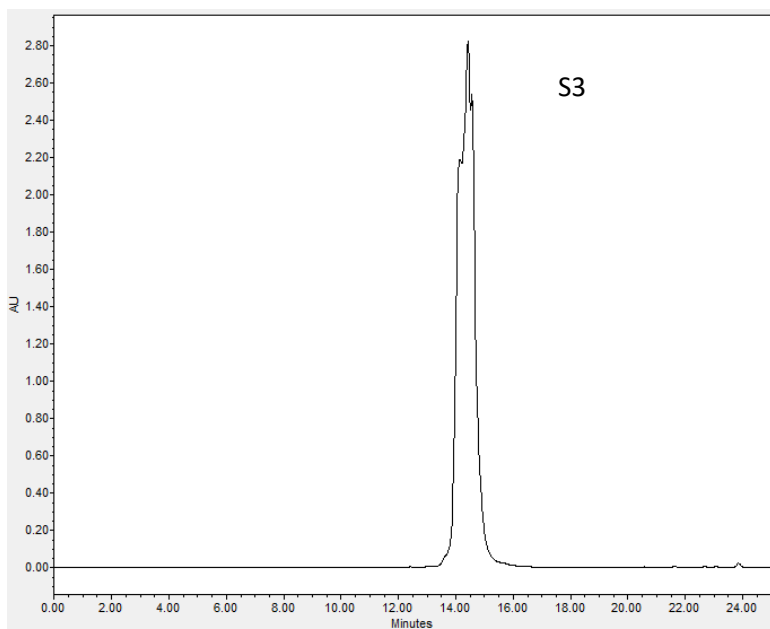

**S4.** Analytical HPLC spectra for the sense strand of corrole-siRNA S3.



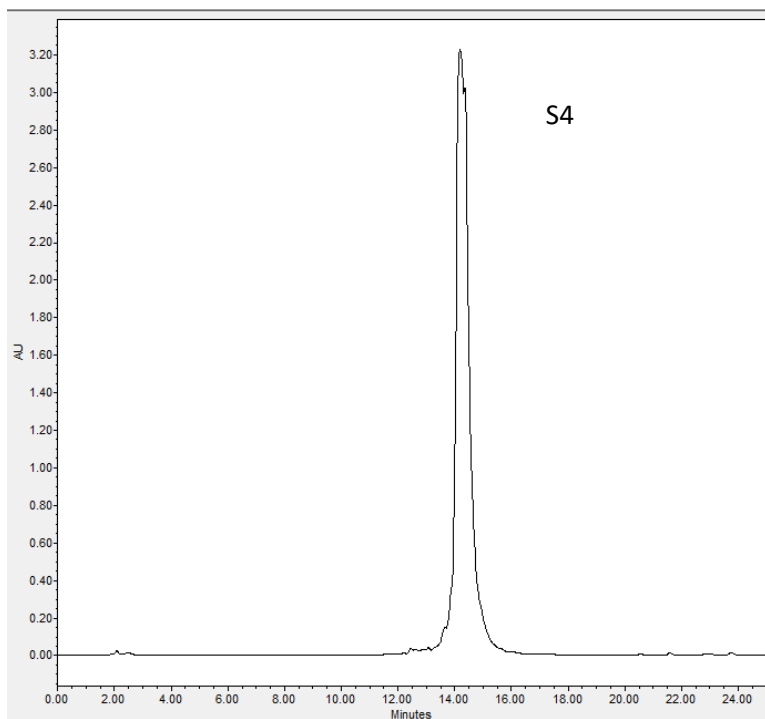

**S5.** Analytical HPLC spectra for the sense strand of corrole-siRNA S4.

IC<sub>50</sub> Data

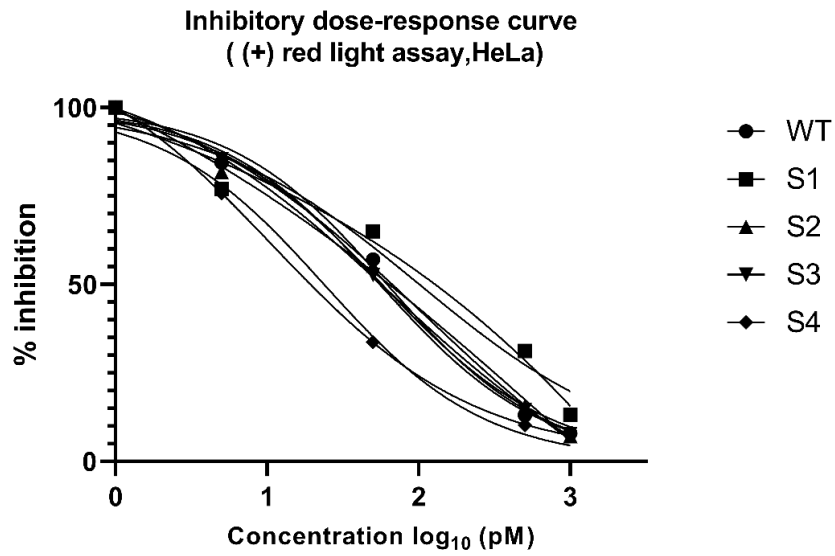

**S6.** Inhibitory dose-response curve for corrole-siRNA and WT siRNA targeting firefly luciferase in HeLa cells irradiated with red light for 2 hours.

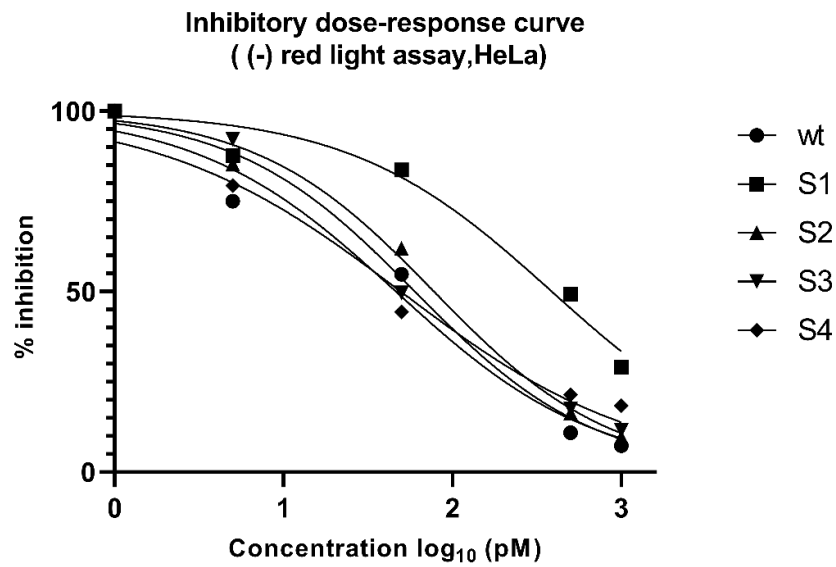

**S7.** Inhibitory dose-response curve for corrole-siRNA and WT siRNA targeting firefly luciferase in HeLa cells kept in dark.
